# Supplementary material for: Switching to a Standard Chow Diet at Weaning Improves the Effects of Maternal and Postnatal High-Fat and High-Sucrose Diet on Cardiometabolic Health in Adult Male Mouse Offspring
Source: MDPI journal article supplement (doi:10.3390/metabo12060563), 2022-06-18
Supplement: s1 [file s1]

**Table S1.** Summary of qRT-PCR oligonucleotide primers used in measuring mRNA expression of mitochondrial biogenesis, pathological cardiac hypertrophy, interstitial collagen content, and metabolism.

| Primer         |         | Sequence              |
|----------------|---------|-----------------------|
| Pparg $\alpha$ | Forward | GCAGTCGCAACATGCTCAAG  |
|                | Reverse | GGGAACCCCTGGGGTCATTT  |
| Tfam           | Forward | TCCACAGAACAGCTACCCAA  |
|                | Reverse | CCACAGGGGCTGCAATTTTCC |
| Nrf1           | Forward | AGAAACGGAAACGGCCTCAT  |
|                | Reverse | CATCCAACGTGGCTCTGAGT  |
| Nrf2           | Forward | ATGGAGCAAGTTTGGCAGGA  |
|                | Reverse | GCTGGGAACAGCGGTAGTAT  |
| Drp1           | Forward | ATGCCAGCAAGTCCACAGAA  |
|                | Reverse | TGTTCTCGGGCAGACAGTTT  |
| Mfn1           | Forward | GCAGACAGCACATGGAGAGA  |
|                | Reverse | GATCCGATTCCGAGCTTCCG  |
| Mfn2           | Forward | TGCACCGCCATATAGAGGAAG |
|                | Reverse | TCTGCAGTGAAGTGGCAATG  |
| Opa1           | Forward | ACCTTGCCAGTTTAGCTCCC  |
|                | Reverse | TTGGGACCTGCAGTGAAGAA  |
| CypD           | Forward | AGATGTCAAATTGGCAGGGGG |
|                | Reverse | TGCGCTTTTCGGTATAGTGCT |
| Myh6           | Forward | ACATTCTTCAGGATTCTCTG  |
|                | Reverse | CTCCTTGTCATCAGGCAC    |
| Myh7           | Forward | TTCCTTACTTGCTACCCTC   |
|                | Reverse | CTTCTCAGACTTCCGCAG    |
| Pln            | Forward | GTTGTGCCCTTTTTCTACAC  |
|                | Reverse | AGAGAGAGCAGATTTGTGG   |

|        |         |                           |
|--------|---------|---------------------------|
| Atp2a2 | Forward | TGTAAGTGGCCAGATTGCTC      |
|        | Reverse | CCTAAACAACCTGAAGTTAGG     |
| Acta1  | Forward | CGACATCAGGAAGGACCTGTATGCC |
|        | Reverse | AGCCTCGTCGTACTCCTGCTTGG   |
| Nppa   | Forward | AGGAGAAGATGCCGGTAGAAGA    |
|        | Reverse | GCTTCCTCAGTCTGCTCACTCA    |
| Nppb   | Forward | CAGCTCTTGAAGGACCAAGG      |
|        | Reverse | AGAGACCCAGGCAGAGTCAG      |
| Col1a1 | Forward | GAAACCCGAGGTATGCTTGA      |
|        | Reverse | GGGTCCCTCGACTCCTACAT      |
| Col3a1 | Forward | CCTGGCTCAAATGGCTCAC       |
|        | Reverse | GACCTCGTGTTCCGGGTAT       |
| Col8a1 | Forward | CAAGTCCCTCACATGCCTTTG     |
|        | Reverse | GCACAGGTGGGATTTCCTTCATA   |
| Ccl2   | Forward | GAAGGAATGGGTCCAGACA       |
|        | Reverse | ACGGGTCAACTTCACATTCA      |
| Hrpt1  | Forward | AGCCCCAAAATGGTTAAGGT      |
|        | Reverse | CAAGGGCATATCCAACAACA      |
| B2m    | Forward | GTCTTTCTGGTGCTTGTCTC      |
|        | Reverse | GTATGTTCCGCTTCCCATTC      |
| Cpt1b  | Forward | TTCACTGTGACCCCAGACGGG     |
|        | Reverse | AATGGACCAGCCCCATGGAGA     |
| Cpt2   | Forward | CTTCTAGAGCCAGAAGTGTTCCA   |
|        | Reverse | AGGAGGTGTCTAGCCTTGGTATC   |
| Cd36   | Forward | GATGTGGAACCCATAACTGGATTAC |
|        | Reverse | GGTCCCAGTCTCATTTAGCCACAGT |

|       |         |                         |
|-------|---------|-------------------------|
| Glut4 | Forward | TCGTCATTGGCATTCTGGTTG   |
|       | Reverse | AGCTCGTTCTACTAAGAGCAC   |
| Mcad  | Forward | TCGAAAGCGGCTCACAAGCAG   |
|       | Reverse | CACCGCAGCTTTCCGGAATGT   |
| Pepck | Forward | CATGACTCGGATGGGCATATC   |
|       | Reverse | CATATCCGCTTACAAAGGAGAT  |
| Irs1  | Forward | AGCACCTGGTGGCTCTCTACA   |
|       | Reverse | CAGCTGCAGAAGAGCCTGGTA   |
| Gapdh | Forward | AGGCCGGTGCTGAGTATGTC    |
|       | Reverse | TGCCTGCTTCACCACCTTCT    |
| Actb  | Forward | AGAAGCTGTGCTATGTTGCTCTA |
|       | Reverse | TCAGGCAGCTCATAGCTCTTC   |
| 36B4  | Forward | CTGTGCCAGCTCAGAACTG     |
|       | Reverse | TGATCAGCCCGAAGGAGAAG    |
| Tbp   | Forward | GCCTTCCACCTTATGCTCAG    |
|       | Reverse | GTTGTTGCTGCTGCTGTTG     |

\**Ppargc1α*, peroxisome proliferator-activated receptor gamma coactivator 1-α (PGC1-α); *Tfam*, mitochondrial transcription factor A; *Nrf*, nuclear respiratory factor; *Drp1*, dynamic-related protein 1; *Mfn*, mitofusin; *Opa1*, optic atrophy protein 1; *Myh6*, cardiac α myosin heavy chain; *Myh7*, cardiac β myosin heavy chain; *Pln*, phospholamban; *Atp2a2*, cardiac sarcoplasmic reticulum Ca<sup>2+</sup> ATPase 2a; *Acta1*, alpha-skeletal muscle actin; *Nppa*, atrial natriuretic peptide; *Nppb*, brain natriuretic peptide; *Colla1*, collagen type 1 alpha chain; *Col3a1*, collagen type III alpha 1 chain; *Col8a1*, collagen type VIII alpha 1 chain; *Ccl2*, C-C motif chemokine ligand 2; *CypD*, peptidylprolyl isomerase D; *Hprt1*, hypoxanthine phosphoribosyltransferase 1; *B2m*, beta-2-microglobulin; *Cpt*, carnitine palmitoyltransferase; *Cd36*, CD 36 molecule; *Glut4*, glucose transporter type 4; *Mcad*, acyl-coA dehydrogenase medium chain; *Pepck*, mitochondrial phosphoenolpyruvate carboxykinase; *Irs1*, insulin receptor substrate 1; *Gapdh*, glyceraldehyde-3-phosphate dehydrogenase; *Actb*, actin beta; *36B4*, ribosomal protein lateral stalk subunit; *Tbp*, TATA-box binding protein.
